# Supplementary material for: Open-label pilot study of romiplostim for thrombocytopenia after autologous hematopoietic cell transplantation
Source: PubMed Central journal article supplement — Blood Adv. 2022 Nov 24;7(8):1536–44. doi: 10.1182/bloodadvances.2022007838 (PMC10130608; doi:10.1182/bloodadvances.2022007838), 2022-11-24
Supplement: BLOODA_ADV-2022-007838-mmc1.pdf [file BLOODA_ADV-2022-007838-mmc1.pdf]

1 **Supplemental Table 1. Romiplostim Treatment Schedules**

|                       |                                                                                                           |                                |                                                                                                               |                                |
|-----------------------|-----------------------------------------------------------------------------------------------------------|--------------------------------|---------------------------------------------------------------------------------------------------------------|--------------------------------|
| <b>Initial dosing</b> | Day +1 and weekly until plt count $>50 \times 10^9/L$ without plt transfusion(s) for 2 days (max 6 doses) |                                |                                                                                                               |                                |
| Romiplostim           | 3.0 $\mu\text{g}/\text{kg}$ SC                                                                            |                                |                                                                                                               |                                |
| <b>Amended dosing</b> | Day +1                                                                                                    | Day +8                         | Day +15 then weekly until plt count $>50 \times 10^9/L$ without any plt transfusions for 2 days (max 6 doses) |                                |
|                       |                                                                                                           |                                | <b>Plt count</b>                                                                                              | <b>Dose</b>                    |
| Romiplostim           | 3.0 $\mu\text{g}/\text{kg}$ SC                                                                            | 2.0 $\mu\text{g}/\text{kg}$ SC | $<20 \times 10^9/L$                                                                                           | 3.0 $\mu\text{g}/\text{kg}$ SC |
|                       |                                                                                                           |                                | $20 \leq \text{Plt} \leq 35 \times 10^9/L$                                                                    | 2.0 $\mu\text{g}/\text{kg}$ SC |
|                       |                                                                                                           |                                | $35 < \text{Plt} \leq 50 \times 10^9/L$                                                                       | 1.0 $\mu\text{g}/\text{kg}$ SC |

2 Plt: platelet(s); SC: subcutaneous.

3 **Supplemental Table 2.** Multivariable Linear Models (Matched Analysis) of Platelet Values

| Characteristic              | Day +21 |       |            |         | Day +30 |       |            |         |
|-----------------------------|---------|-------|------------|---------|---------|-------|------------|---------|
|                             | N       | Beta† | 95% CI     | P-value | N       | Beta† | 95% CI     | P-value |
| Group                       |         |       |            |         |         |       |            |         |
| • Retrospective             | 113     | Ref   | --         | --      | 108     | Ref   | --         | --      |
| • Romiplostim               | 57      | 40    | 14, 67     | 0.003   | 59      | 118   | 84, 152    | <0.001  |
| Age                         | 170     | -0.5  | -1.8, 0.76 | 0.4     | 167     | -0.14 | -1.8, 1.5  | 0.9     |
| Sex                         |         |       |            |         |         |       |            |         |
| • Female                    | 77      | Ref   | --         | --      | 77      | Ref   | --         | --      |
| • Male                      | 97      | -14   | -39, 12    | 0.3     | 97      | -25   | -58, 6.9   | 0.12    |
| Conditioning regimen        |         |       |            |         |         |       |            |         |
| • Melphalan                 | 115     | Ref   | --         | --      | 115     | Ref   | --         | --      |
| • BEAM                      | 46      | -6.3  | -39, 27    | 0.7     | 46      | -25   | -67, 16    | 0.2     |
| • TBC                       | 9       | 16    | -42, 74    | 0.6     | 9       | -79   | -152, -6.5 | 0.03    |
| Lines of prior therapy      |         |       |            |         |         |       |            |         |
| • 1                         | 96      | Ref   | --         | --      | 96      | Ref   | --         | --      |
| • 2                         | 47      | -26   | -56, 4.4   | 0.09    | 47      | -11   | -50, 27    | 0.6     |
| • ≥3                        | 27      | -26   | -63, 10    | 0.2     | 27      | -29   | -75, 17    | 0.2     |
| CD34+ cell dose (x 10E6/kg) | 170     | 6.1   | -3.8, 16   | 0.3     | 170     | 9.3   | -2.8, 21   | 0.13    |

4 † Beta refers to the degree of change in the outcome (platelet count, x 10<sup>9</sup>) for every 1-unit of

5 change in the predictor variable. BEAM: carmustine, etoposide, cytarabine, melphalan; N:

6 Number; TBC: thiotepa, busulfan, cyclophosphamide.

7 **Supplemental Table 3.** All Adverse Events in Study Patients After Auto-HCT

| <b>Adverse Event (AE) System</b>          | <b>N</b> | <b>Total N (%)</b> |
|-------------------------------------------|----------|--------------------|
| <b>Gastrointestinal Disorders</b>         |          | 174 (32)           |
| Nausea                                    | 48       |                    |
| Diarrhea                                  | 34       |                    |
| Esophagitis                               | 21       |                    |
| Gastroesophageal reflux disease           | 15       |                    |
| Vomiting                                  | 13       |                    |
| Mucositis oral                            | 10       |                    |
| Constipation                              | 7        |                    |
| Dyspepsia                                 | 7        |                    |
| Abdominal pain                            | 4        |                    |
| Dry mouth                                 | 4        |                    |
| Rectal pain                               | 3        |                    |
| Colitis                                   | 2        |                    |
| Hemorrhoids                               | 2        |                    |
| Bloating                                  | 1        |                    |
| Gastritis                                 | 1        |                    |
| Oral pain                                 | 1        |                    |
| Rectal hemorrhage                         | 1        |                    |
| <b>General Disorders</b>                  |          | 80 (15)            |
| Fatigue                                   | 41       |                    |
| Fever                                     | 19       |                    |
| Non-cardiac chest pain                    | 8        |                    |
| Fluid Overload                            | 5        |                    |
| Edema limbs                               | 2        |                    |
| Pain                                      | 3        |                    |
| Chills                                    | 1        |                    |
| Malaise                                   | 1        |                    |
| <b>Nervous System Disorders</b>           |          |                    |
| Dysgeusia                                 | 10       |                    |
| Headache                                  | 10       |                    |
| Peripheral sensory neuropathy             | 8        |                    |
| Syncope                                   | 5        |                    |
| Paresthesia                               | 2        |                    |
| Presyncope                                | 2        |                    |
| Tremor                                    | 2        |                    |
| Dizziness                                 | 2        |                    |
| Brachial plexopathy                       | 1        |                    |
| Peripheral motor neuropathy               | 1        |                    |
| <b>Metabolism and Nutrition Disorders</b> |          | 40 (7)             |
| Anorexia                                  | 37       |                    |
| Dehydration                               | 1        |                    |
| Hyperglycemia                             | 1        |                    |
| Hyponatremia                              | 1        |                    |
| <b>Infections and Infestations</b>        |          | 26 (5)             |
| Sepsis                                    | 7        |                    |

|                                                         |    |        |
|---------------------------------------------------------|----|--------|
| Enterocolitis infectious                                | 5  |        |
| Upper respiratory infection                             | 3  |        |
| Lung infection                                          | 2  |        |
| Bacteremia                                              | 1  |        |
| Catheter related infection                              | 1  |        |
| Cytomegalovirus infection reactivation                  | 1  |        |
| Folliculitis                                            | 1  |        |
| COVID-19                                                | 1  |        |
| Rhinitis infective                                      | 1  |        |
| Thrush                                                  | 1  |        |
| Urinary tract infection                                 | 1  |        |
| Vaginal infection                                       | 1  |        |
| <b>Musculoskeletal and Connective Tissue Disorders</b>  |    | 26 (5) |
| Back pain                                               | 9  |        |
| Bone pain                                               | 7  |        |
| Arthralgia                                              | 5  |        |
| Muscle weakness lower limb                              | 2  |        |
| Muscle cramp                                            | 1  |        |
| Myalgia                                                 | 1  |        |
| Pain in extremity                                       | 1  |        |
| <b>Blood and Lymphatic System Disorders</b>             |    | 25 (5) |
| Febrile Neutropenia                                     | 25 |        |
| <b>Vascular Disorders</b>                               |    | 24 (4) |
| Hypotension                                             | 16 |        |
| Hypertension                                            | 4  |        |
| Thromboembolic event                                    | 1  |        |
| Hematoma                                                | 1  |        |
| Flushing                                                | 1  |        |
| Orthostatic Hypotension                                 | 1  |        |
| <b>Skin and Subcutaneous Tissue Disorders</b>           |    | 20 (4) |
| Rash maculo-papular                                     | 14 |        |
| Toxic erythema of chemotherapy                          | 2  |        |
| Skin lesion                                             | 1  |        |
| Dry skin                                                | 1  |        |
| Skin hypopigmentation                                   | 1  |        |
| Urticaria                                               | 1  |        |
| <b>Psychiatric Disorders</b>                            |    | 17 (3) |
| Insomnia                                                | 9  |        |
| Anxiety                                                 | 3  |        |
| Confusion                                               | 1  |        |
| Delirium                                                | 1  |        |
| Depression                                              | 1  |        |
| Hallucinations                                          | 1  |        |
| Psychosis                                               | 1  |        |
| <b>Respiratory, Thoracic, And Mediastinal Disorders</b> |    | 17 (3) |
| Cough                                                   | 5  |        |
| Dyspnea                                                 | 3  |        |

|                                                        |    |        |
|--------------------------------------------------------|----|--------|
| Atelectasis                                            | 2  |        |
| Aspiration                                             | 1  |        |
| Hiccups                                                | 1  |        |
| Hypoxia                                                | 1  |        |
| Nasal congestion                                       | 1  |        |
| Pleural effusion                                       | 1  |        |
| Rhinorrhea                                             | 1  |        |
| Sore throat                                            | 1  |        |
| <b>Immune System Disorders</b>                         |    | 16 (3) |
| Engraftment Syndrome                                   | 16 |        |
| <b>Investigations</b>                                  |    | 11 (2) |
| Alanine aminotransferase increased                     | 4  |        |
| Platelet count decreased                               | 3  |        |
| Aspartate aminotransferase increased                   | 2  |        |
| Neutrophil count decreased                             | 1  |        |
| White blood cell decreased                             | 1  |        |
| <b>Injury, poisoning, and procedural complications</b> |    | 9 (2)  |
| Fall                                                   | 6  |        |
| Infusion Related Reaction                              | 3  |        |
| <b>Eye disorders</b>                                   |    | 6 (1)  |
| Blepharitis                                            | 1  |        |
| R eye stye                                             | 1  |        |
| Blurred vision                                         | 1  |        |
| Blurred vision                                         | 1  |        |
| Dry eye                                                | 1  |        |
| Periorbital edema                                      | 1  |        |
| <b>Cardiac disorders</b>                               |    | 4 (1)  |
| Sinus tachycardia                                      | 2  |        |
| Palpitations                                           | 1  |        |
| Sinus tachycardia                                      | 1  |        |
| <b>Renal and urinary disorders</b>                     |    | 4 (1)  |
| Dysuria                                                | 2  |        |
| Hematuria                                              | 1  |        |
| Urinary frequency                                      | 1  |        |
| <b>Ear and labyrinth disorders</b>                     |    | 1 (<1) |
| Vertigo                                                | 1  |        |
| <b>Reproductive system and breast disorders</b>        |    | 1 (<1) |
| Vaginal Pain                                           | 1  |        |

10 **Supplemental Table 4.** Comparison of Romiplostim-Treated Patients and 2:1 Matched Data

|                             |                                     | <b>N</b> | <b>Days of plt transfusions or Grade 4 thrombocytopenia</b><br><i>median (range)</i> | <b>Days of plt transfusions or Grade 4 thrombocytopenia</b><br><i>mean (IQR)</i> | <b>Plt transfusions per patient</b><br><i>median (range)</i> | <b>Plt transfusions per patient</b><br><i>mean (IQR)</i> |
|-----------------------------|-------------------------------------|----------|--------------------------------------------------------------------------------------|----------------------------------------------------------------------------------|--------------------------------------------------------------|----------------------------------------------------------|
| <b>Romiplostim</b>          | <b>MM</b><br>Melphalan              | 40       | 6 (0-17)                                                                             | 6.2 (4-8)                                                                        | 2 (0-7)                                                      | 2.2 (1-3)                                                |
|                             | <b>Lymphoma</b><br>BEAM; TBC        | 19       | 11 (4-17)                                                                            | 10.9 (8.5-13.5)                                                                  | 5 (2-10)                                                     | 5.1 (3-6.5)                                              |
| <b>Matched control data</b> | <b>MM</b><br>Melphalan              | 80       | 4 (1-23)                                                                             | 6.1 (3.7)                                                                        | 2 (0-13)                                                     | 2.7 (1-3)                                                |
|                             | <b>Lymphoma</b><br>BEAM/CBV;<br>TBC | 38       | 8 (3-68)                                                                             | 10.6 (6-11)                                                                      | 4 (2-44)                                                     | 6.2 (3-6)                                                |

11

12 **Supplemental Table 5.** Comparison of RBC Transfusions for Romiplostim-treated and  
13 Retrospective Data

|          |               | N   | RBC transfusions<br><i>median (range)</i> | RBC transfusions<br><i>mean (IQR)</i> |
|----------|---------------|-----|-------------------------------------------|---------------------------------------|
| MM       | Romiplostim   | 40  | 0 (0-5)                                   | 0.7 (0-1)                             |
|          | Retrospective | 484 | 0 (0-18)                                  | 1.24 (0-2)                            |
| Lymphoma | Romiplostim   | 19  | 3 (0-7)                                   | 2.58 (1-4)                            |
|          | Retrospective | 369 | 2 (0-19)                                  | 2.4 (1-3)                             |

14

15 **Supplemental Figure 1.** Hemoglobin Recovery for All Patients (Romiplostim-Treated v.  
16 Retrospective Data

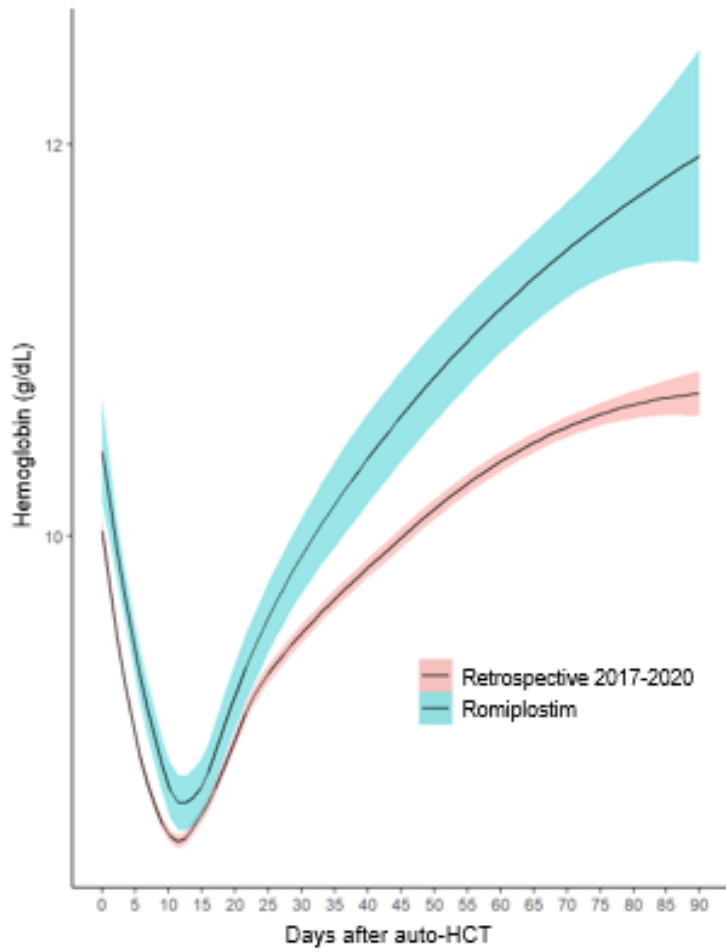

17

18 **Supplemental Figure 1 Legend**

19 Solid lines represent the median hemoglobin value (g/dL) with 95% confidence intervals (blue =  
20 romiplostim study patients; pink = retrospective data).



21 **Supplemental Figure 2.** Hemoglobin Recovery Stratified by MM (A) and Lymphoma (B) v.  
22 Retrospective Data

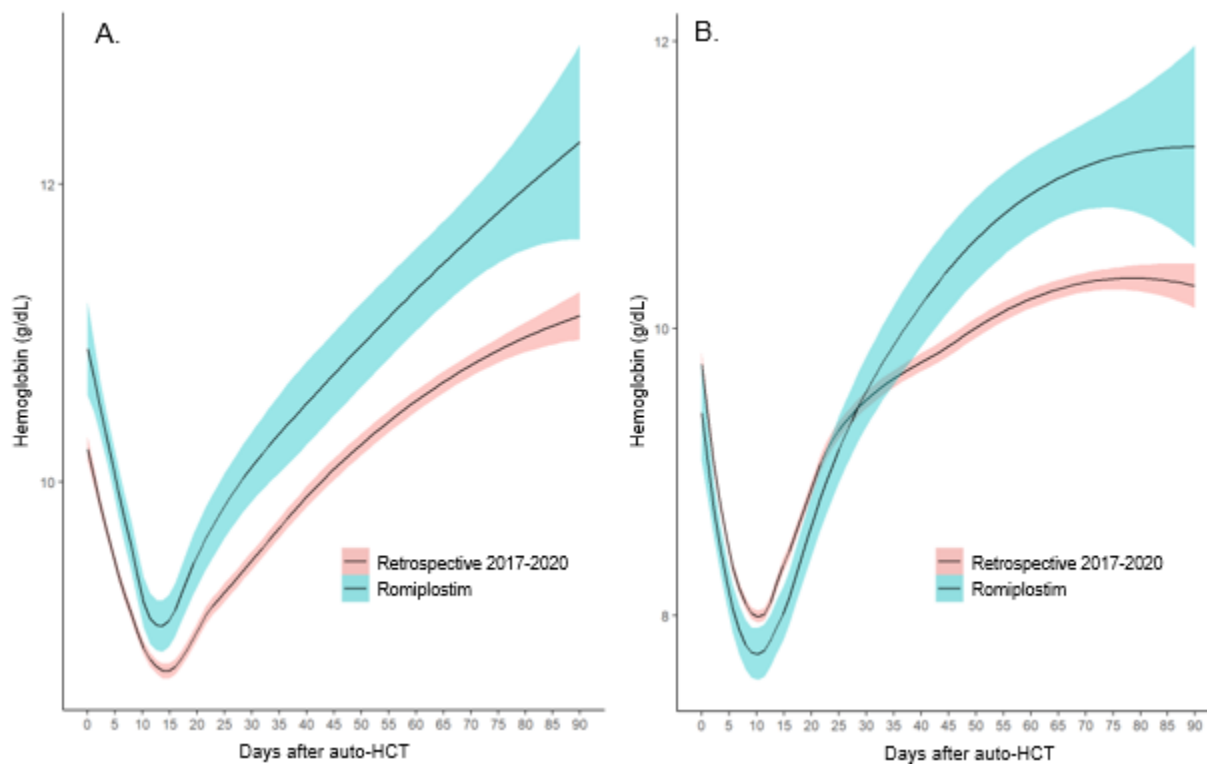

23  
24 **Supplemental Figure 2 Legend**  
25 Solid lines represent the median hemoglobin value (g/dL) with 95% confidence intervals (blue =  
26 romiplostim study patients; pink = retrospective data).
